# Supplementary material for: Galectin-4, a Novel Predictor for Lymph Node Metastasis in Lung Adenocarcinoma
Source: PubMed Central journal article supplement (PMC3858289; doi:10.1371/journal.pone.0081883), 2013-12-10
Supplement: pone.0081883.s005.pdf [file pone.0081883.s005.pdf]

**Table S1. Clinicopathological features of discovery samples (10 cases)**

| Sample No | Age | Gender | Histology                  | pStage         |
|-----------|-----|--------|----------------------------|----------------|
| P1        | 64  | M      | Solid predominant type     | IIA (T1bN1M0)  |
| P2        | 68  | M      | Papillary predominant type | IIA (T2aN1M0)  |
| P3        | 77  | M      | Papillary predominant type | IIIA (T3aN2M0) |
| P4        | 64  | M      | Papillary predominant type | IIIA (T2aN2M0) |
| P5        | 74  | F      | Papillary predominant type | IIIA (T2aN2M0) |
| N1        | 78  | M      | Acinar predominant type    | IA (T1bN0M0)   |
| N2        | 77  | F      | Lepidic predominant type   | IB (T2aN0M0)   |
| N3        | 80  | M      | Lepidic predominant type   | IB (T2aN0M0)   |
| N4        | 71  | M      | Acinar predominant type    | IB (T2aN0M0)   |
| N5        | 77  | F      | Acinar predominant type    | IIB (T3N0M0)   |
